# Supplementary material for: Assessing the Aflatoxins Mitigation Efficacy of Blueberry Pomace Biosorbent in Buffer, Gastrointestinal Fluids and Model Wine
Source: PubMed Central journal article supplement (PMC7405022; doi:10.3390/toxins12070466), 2020-07-21
Supplement: toxins-12-00466-s001.pdf [file toxins-12-00466-s001.pdf]

# Supplementary Materials: Assessing the Aflatoxins Mitigation Efficacy of Blueberry Pomace Biosorbent in Buffer, Gastrointestinal Fluids and Model Wine

Usman Rasheed, Qurat Ul Ain, Muhammad Yaseen, Sayantan Santra, Xiaohua Yao and Bin Liu

|                | Atomic % (XPS analysis) |      |       |
|----------------|-------------------------|------|-------|
|                | C1s                     | N1s  | O1s   |
| <b>BB</b>      | 76.49                   | 1.64 | 19.29 |
| <b>BB-AFB1</b> | 78.46                   | 1.31 | 18.05 |

Figure S1 Elemental analysis obtained from XPS analysis.

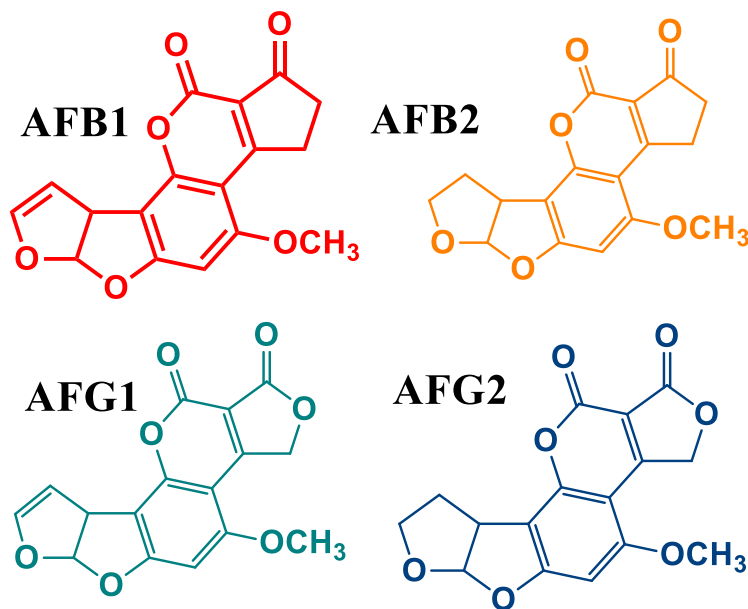

Figure S2. Chemical structures of the four types of AFs.

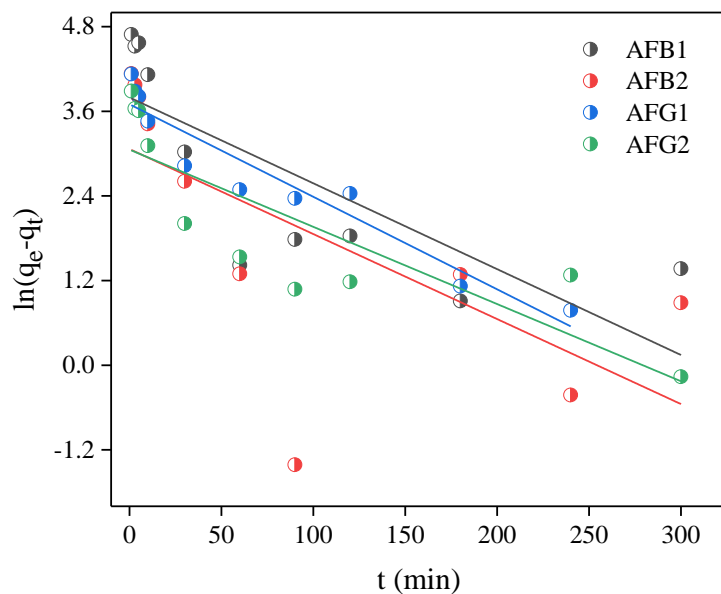

**Figure S3.** Pseudo first order kinetics model for the adsorption of AFs onto BB (dosage = 2 mg/mL and  $C_0 = 2$  ppm for AFB1 and 1 ppm each for AFB2, AFG1 and AFG2).

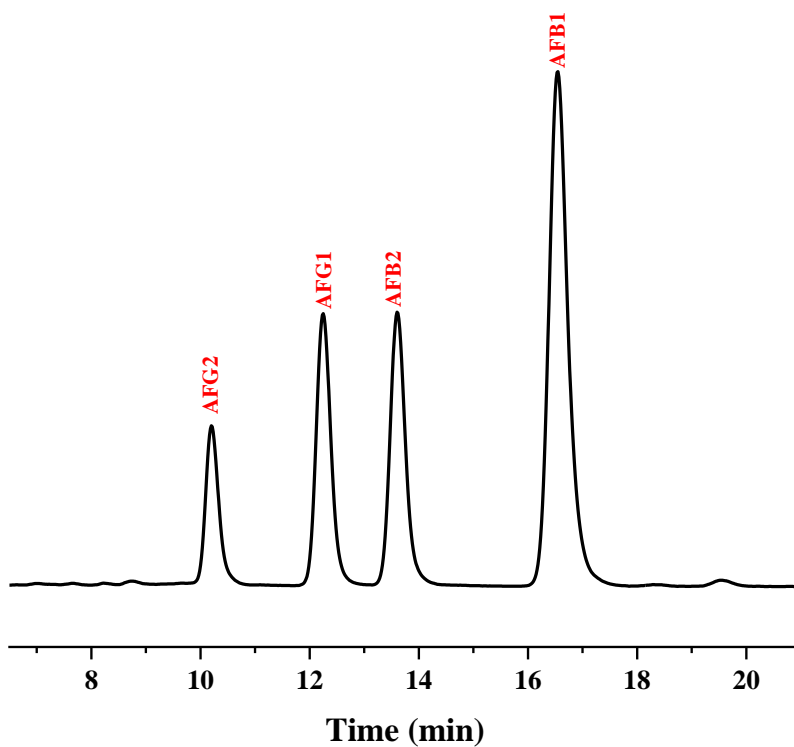

**Figure S4 .** HPLC chromatogram of multi-AFs system.

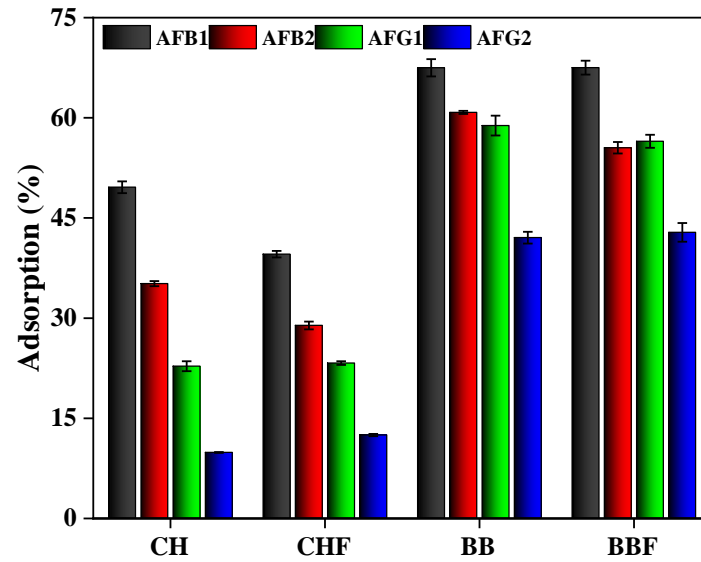

**Figure S5.** Initial screening of different adsorbents for the adsorption of AFs (dosage = 2 mg/mL and  $C_0 = 2$  ppm for AFB1 and 1 ppm each for AFB2, AFG1 and AFG2).
